# Supplementary material for: HTR1A Inhibits the Progression of Triple‐Negative Breast Cancer via TGF‐β Canonical and Noncanonical Pathways
Source: PubMed Central journal article supplement (PMC9036047; doi:10.1002/advs.202105672), 2022-02-24
Supplement: ADVS-9-2105672-s001.pdf [file ADVS-9-2105672-s001.pdf]

## Supporting Information

for *Adv. Sci.*, DOI 10.1002/adv.202105672

HTR1A Inhibits the Progression of Triple-Negative Breast Cancer via TGF- $\beta$  Canonical and Noncanonical Pathways

*Qiqi Liu, Hefen Sun\**, Yang Liu, Xuan Li, Baojin Xu, Liangdong Li and Wei Jin\*

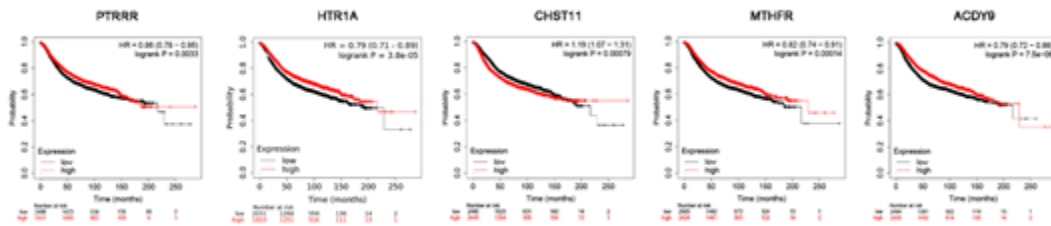

Supplementary Figure 1. The antitumor effect of HTR1A agonists.

The overall survival of indicated genes by the Kaplan-Meier plotter online database.

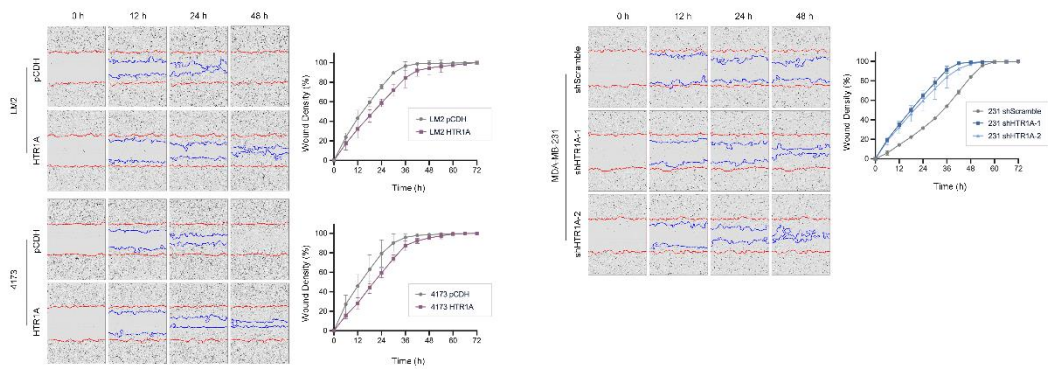

Supplementary Figure 2. HTR1A inhibited the migration of TNBC cells

The wound healing assay of HTR1A overexpression in LM2 and 4173 cells and HTR1A knockdown in MDA-MB-231 cells.

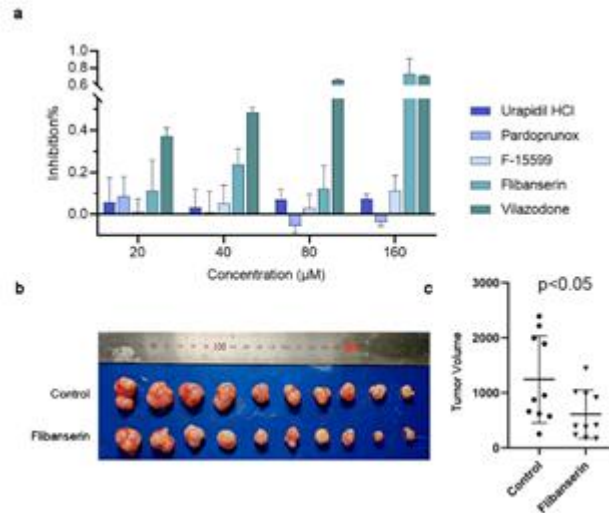

Supplementary Figure 3. The antitumor effect of HTR1A agonists.

a: The inhibition rate of HTR1A agonists in 48h on LM2 cells by CCK8; b-c: The tumor growth of mouse xenograft models treated with flibanserin and control.

**Supplementary Table 1: The primer sequences of depression-related genes.**

| Gene  | Primer sequence (5'-3') | Gene   | Primer sequence (5'-3') |
|-------|-------------------------|--------|-------------------------|
| ACE   | GGUGGUAUCUUCGAACCAA     | ITPR1  | GGACGAGGCUGGAAAUGAA     |
|       | TT                      |        | TT                      |
|       | GGUCCAACAUCUAUGACUU     |        | GCACUUUGUUCACUGCAUA     |
|       | TT                      |        | TT                      |
| ADCY9 | CCAGGACUCAAGGUGACUU     | KLHL29 | GCUUUCAAUGUCUGCAAUA     |
|       | TT                      |        | TT                      |
|       | GCCAAGAAUCAUAGCCGAU     |        | CCUGAUUGCACACUCCUAU     |
|       | TT                      |        | TT                      |
| APOE  | CCAUCAGGAUGGUGUUCUU     | LHFPL2 | GGAACCCGCAGAACAACAA     |
|       | TT                      |        | TT                      |
|       | CCAAGCUGCUGUACGACAU     |        | GCGUCGUGAUAAAGAAAUA     |
|       | TT                      |        | TT                      |
|       | GUCACAUUCCUGGCAGGAU     |        | CCGAGCUCAUUGCCUUCAU     |
|       | TT                      |        | TT                      |

|       |                      |        |                      |
|-------|----------------------|--------|----------------------|
|       | GAGUUGAAGGCCUACAAAU  |        | GCCAUAGACUACUGUGGAC  |
|       | TT                   |        | TT                   |
|       | CGUUGCUGGUCACAUUCCU  |        | GCAGAAAUUGCAACCUCUA  |
|       | TT                   |        | TT                   |
| CHST1 | CCACUUGCUUGGGAUCCU   | MAOA   | GCUGAACCAUGAACAUUUAU |
| 1     | TT                   |        | TT                   |
|       | GGUACGGCACCAAGAUCAU  |        | GCAGCUAGGGAGGUCUUA   |
|       | TT                   |        | TT                   |
|       | GCAAAGUCUACGAGAACUA  |        | GCUUUACAUCCAGUGCAU   |
|       | TT                   |        | TT                   |
| DNAJB | GGAGAUUUACGACCGCUAU  | MTHFR  | GCACAUCCGAAGUGAGUUU  |
| 2     | TT                   |        | TT                   |
|       | GCAGCUGAAGUCAGUCACA  |        | GCCAAUCAAGACAACGAU   |
|       | TT                   |        | TT                   |
|       | CCUACAGCCUGUCAGAGAU  |        | CCGGGUUAAUUAACCACCU  |
|       | TT                   |        | TT                   |
| DRD4  | GCCUCCAUCUUAACCUGU   | PCLO   | GCCGAUUCCUAAGCAGCAA  |
|       | TT                   |        | TT                   |
|       | GACUACGUGGUCUACUCGU  |        | GCAACAAACUUUGUACCAU  |
|       | TT                   |        | TT                   |
|       | CCUUCUUCGUGGUGCACAU  |        | GCAAGAAUCAAGUGUGUAA  |
|       | TT                   |        | TT                   |
| EHD3  | CCUUUGGCAACGCCUUCU   | PHACTR | GGAGACGCUGACUUCAGAA  |
|       | TT                   | 3      | TT                   |
|       | GGAAGGACAACAAGAAGAA  |        | GCGCUGAACGACUCCAUA   |
|       | TT                   |        | TT                   |
|       | CCAUGUACGACGAGAUCU   |        | GCAAGCACUUGACAAGAU   |
|       | TT                   |        | TT                   |
| FREM3 | GCUUUCAUGGUGGUGUAA   | PTPRR  | GCUGAACAUAAACCUUGCU  |
|       | TT                   |        | TT                   |
|       | GCCCUUCAUCGUUAUAUGAA |        | CCAACGUAUCUCUUAUUAU  |
|       | TT                   |        | TT                   |
|       | GCCAGGUCCUGAUUAUCAA  |        | CCAGUGAGCAGUAUGAAU   |

|       |                     |         |                     |
|-------|---------------------|---------|---------------------|
|       | TT                  |         | TT                  |
|       | GGGCAGCAGAAGACUGUAU |         | UCAACUCCCUGACGAGCUU |
| GNB3  | TT                  | SLC6A3  | TT                  |
|       | GGUCAUGACCUGUGCCUAU |         | UCAUCUACCCGGAAGCCAU |
|       | TT                  |         | TT                  |
|       | CCUGGAUGACAACAAUAU  |         | CCAUCUAUGCGGCCUACAA |
|       | TT                  |         | TT                  |
|       | GCAGCCUUGUAGCUGCAA  |         | CCACCGAAAUGGAUGCAUU |
| HS6ST | TT                  | SLC6A4  | TT                  |
| 3     | GGCUGCUAUAACUUGACUU |         | GCAUCUGGAAAGGCGUCA  |
|       | TT                  |         | TT                  |
|       | GCAUUGAGGAUCUAAACUU |         | CCUCCUCUUCAUCACGUAU |
|       | TT                  |         | TT                  |
|       | GCGGCAACACUACUGGUAU |         | CCAAGCCUGAAGUCAGCUU |
| HTR1A | TT                  | SLC25A2 | TT                  |
|       | GGCUUAUUGGCUUCCUCAU | 1       | GCCAUUGCUGGAUUGGGAU |
|       | TT                  |         | TT                  |
|       | GCAACUCCAAAGAGCACUU |         | GGAGAGAUCAAGUACAGAA |
|       | TT                  |         | TT                  |
|       | GGGUUCCUCAAGCCAACUU |         | GCAGCUAACACUAAAUA   |
| HTR1B | TT                  | TPH2    | TT                  |
|       | CCUCGGUCACCUCUAUUA  |         | CCAUGAACUCUUGGGACAU |
|       | TT                  |         | TT                  |
|       | CCAUGUCCAAUGAGGACUU |         | GCUUACAGGAAUGCCUUAU |
|       | TT                  |         | TT                  |
|       | GCUCUACAGUAAUGACUUU |         | GCUGUUCUCCCUUCAGUA  |
| HTR2A | TT                  | UGT2A1  | TT                  |
|       | CCAUGCCAAUACCAGUCUU |         | GCUUUAGAUGGUAGCCAUU |
|       | TT                  |         | TT                  |
|       | GCUUUGGCCUACAAGUCUA |         | GCAUAAUGUGACUGUCCUA |
|       | TT                  |         | TT                  |
|       | GCGUGCAGUUUAGAGACAU |         | GACCUGUUGAACUAUCAGU |
| HTR3B | TT                  | VGLL4   | TT                  |

|      |                     |      |                     |
|------|---------------------|------|---------------------|
|      | GCUGAUUCCUAGCAUCUUU |      | CCACGUCUCCAAAAUGAGU |
|      | TT                  |      | TT                  |
|      | GCUUUGACCGACUGCUCUU |      | GCCUCAGUUACCAAAGAAA |
|      | TT                  |      | TT                  |
| NC-1 | UUCUCCGAACGUGUCACGU | NC-2 | GCGACGAUCUGCCUAAGAU |
|      | TT                  |      |                     |

**Supplementary Table 2. All antibodies used in this study.**

| Antibody      | Species | Working concentration       | Company     |
|---------------|---------|-----------------------------|-------------|
| HTR1A         | Rabbit  | 1:1000 for WB, 1:50 for IP  | Abcam       |
| TβRII         | Mouse   | 1:2000 for WB, 1:50 for IP  | Proteintech |
| p-Smad3       | Rabbit  | 1:1000 for WB               | Abcam       |
| TβR1          | Rabbit  | 1:1000 for WB               | Abcam       |
| Smad3         | Rabbit  | 1:1000 for WB               | Abcam       |
| Total MEK     | Rabbit  | 1:1000 for WB               | CST         |
| Phospho-MEK   | Rabbit  | 1:1000 for WB               | CST         |
| Total ERK     | Rabbit  | 1:1000 for WB               | Abcam       |
| Phospho-ERK   | Rabbit  | 1:1000 for WB               | Abcam       |
| c-Myc         | Rabbit  | 1:1000 for WB               | Abcam       |
| E-cadherin    | Rabbit  | 1:1000 for WB               | Proteintech |
| N-cadherin    | Rabbit  | 1:25000 for WB              | Proteintech |
| Fibronectin 1 | Mouse   | 1:1000 for WB               | Proteintech |
| TRIM21        | Rabbit  | 1:1000 for WB, 1:200 for IP | Proteintech |
| PSMD7         | Rabbit  | 1:1000 for WB, 1:200 for IP | Proteintech |

**Supplementary Table 3. The proteins detected by MS/MS.**

| Gene Symbol | Full Name                                                        | Protein score | Coverage (%) | Peptides | Unique | Avg. Mass |
|-------------|------------------------------------------------------------------|---------------|--------------|----------|--------|-----------|
| PPP1CC      | Serine/threonine-protein phosphatase PP1-gamma catalytic subunit | 173.04        | 37           | 12       | 1      | 36984     |
| RPLP0       | 60S acidic ribosomal protein P0                                  | 163.02        | 49           | 11       | 11     | 34274     |
| PAWR        | PRKC apoptosis WT1 regulator protein                             | 151.84        | 34           | 9        | 9      | 36568     |
| EEF1A1      | Elongation factor 1-alpha 1                                      | 148.29        | 27           | 9        | 9      | 50141     |

|           |                                                      |        |    |   |   |       |
|-----------|------------------------------------------------------|--------|----|---|---|-------|
| HNRNPD    | Heterogeneous nuclear ribonucleoprotein D0           | 136.46 | 22 | 8 | 8 | 38434 |
| PSMD7     | 26S proteasome non-ATPase regulatory subunit 7       | 123.42 | 13 | 5 | 5 | 37025 |
| EIF3F     | Eukaryotic translation initiation factor 3 subunit F | 113.71 | 14 | 4 | 4 | 37564 |
| HNRNPH3   | Heterogeneous nuclear ribonucleoprotein H3           | 109.8  | 15 | 5 | 5 | 36926 |
| TRIM21    | E3 ubiquitin-protein ligase TRIM21                   | 101.56 | 17 | 8 | 8 | 54170 |
| JUN       | Transcription factor AP-1                            | 90.88  | 11 | 3 | 3 | 35676 |
| CREB1     | Cyclic AMP-responsive element-binding protein 1      | 83.3   | 9  | 3 | 3 | 36688 |
| SEC13     | Protein SEC13 homolog                                | 79.76  | 17 | 4 | 4 | 35541 |
| HNRNPA1L2 | Heterogeneous nuclear ribonucleoprotein A1-like 2    | 78.76  | 9  | 4 | 1 | 34225 |
| CORO1C    | Coronin-1C                                           | 77.91  | 8  | 3 | 3 | 53249 |
| EIF3G     | Eukaryotic translation initiation factor 3 subunit G | 68.07  | 11 | 3 | 3 | 35611 |
| PLAUR     | Urokinase plasminogen activator surface receptor     | 66.21  | 10 | 3 | 3 | 36978 |
| WDR77     | Methylosome protein 50                               | 63.31  | 8  | 2 | 2 | 36724 |
| MFGE8     | Lactadherin                                          | 61.92  | 9  | 3 | 3 | 43105 |
| CEBPB     | CCAAT/enhancer-binding protein beta                  | 58.7   | 7  | 1 | 1 | 36106 |
| PLAUR     | Urokinase plasminogen activator surface receptor     | 56.51  | 4  | 1 | 1 | 36978 |
